OBSERVATIONS

**Quality of Diabetes Care in Italy: Information From a Large Population-Based Multiregional Observatory (ARNO Diabetes)**

**A** marked variability has been documented in the therapeutic approaches to diabetes by various countries, suggesting that the level of care currently delivered may not produce the expected health-related gains. We investigated quality of care indicators in a large, representative multiregional population-based cohort of people (the ARNO Observatory) living in four Italian regions (2 million inhabitants), assessing process indicators and hospital admissions as outcome indicators (1). Diabetic individuals were identified in 2010 through record linkage among prescriptions, hospital admissions, and local diabetes registries. The guidelines of the Italian scientific societies recommend that risk factors such as lipids and microalbuminuria should be tested at least once a year in all patients with type 2 diabetes, and HbA<sub>1c</sub> should be tested at least twice a year, even in people with stable glycemic control over time and more frequently in insulin-treated and -complicated people (2,3).

Of 126,163 diabetic individuals (prevalence of diabetes 5.8%, mean age 71 years), as many as 42% did not have their HbA<sub>1c</sub> measured for over a year. Even considering only insulin-treated people, this frequency remains disappointingly high (35%). The proportion of people having at least two annual tests for HbA<sub>1c</sub> was low (32.7%; 43.1% among insulin-treated patients). We can hypothesize that a subgroup of diabetic patients might rely on self-monitoring of blood glucose rather than on HbA<sub>1c</sub> measurement; however, its usefulness in noninsulin-treated diabetes is questionable and does not eliminate the need for measuring HbA<sub>1c</sub>. Another disappointing finding is the very low proportion of subjects in whom microalbuminuria was tested

(27%) in spite of its role as a strong predictor of cardiovascular diseases and dialysis. Annual testing for plasma total cholesterol (61.2%), creatinine (58.9%), eye examination (11.1%), electrocardiogram (25.1%), and arterial echo-Doppler (15.9%) were low. It is remarkable also that among diabetic individuals discharged for acute myocardial infarction (AMI), only 39% were treated with statins. Compared with nondiabetic individuals of similar age and sex, outcome indicators over the previous year showed increased odds ratios for amputations (12.28, 95% CI 8.39–18.27), laser photocoagulation (9.82, 8.16–11.84), hospital admissions for stroke (2.38, 2.26–2.50), acute heart failure (2.57, 2.44–2.70), and AMI (2.38, 2.26–2.50). These findings might be largely driven by inadequacy of care in the community in spite of universal coverage from the Italian National Health Service. Noteworthy, our data were recorded 2 years after the publication of the first edition of the Italian Standards of Care for Diabetes (2) and during the implementation of its second edition, which included a pocket version for general practitioners (GPs) (3).

The strength of this report is the population-based multiregional study design, which includes a great number of patients cared for by diabetes clinics and GPs. In this respect, we extend previous evidence limited to process indicators obtained in the setting of specialized clinics (4), pointing out widespread inadequacy of care provided by both diabetes clinics and GPs.

In conclusion, this population-based study shows that the implementation of diabetes care guidelines is far from being satisfactory in Italy, consistent with what has been observed in other Western countries. A greater adherence to guidelines by diabetes caregivers is needed to reduce the burden of diabetes complications.

**GRAZIELLA BRUNO, MD<sup>1</sup>**  
**ENZO BONORA, MD, PHD<sup>2</sup>**  
**ROBERTO MICCOLI, MD, PHD<sup>3</sup>**  
**OLGA VACCARO, MD<sup>4</sup>**  
**ELISA ROSSI, BS<sup>5</sup>**  
**DAVIDE BERNARDI, BS<sup>5</sup>**  
**MARISA DE ROSA, PHARMAD<sup>5</sup>**  
**GIULIO MARCHESINI, MD<sup>6</sup>**  
**FOR THE SID-CINECA ARNO WORKING GROUP**

From the <sup>1</sup>Department of Internal Medicine, University of Turin, Turin, Italy; the <sup>2</sup>Department of Medicine, Section of Endocrinology, Diabetes and Metabolism, University of Verona and University Hospital of Verona, Verona, Italy; the <sup>3</sup>Department of Endocrinology and Metabolism, Section of Metabolic Diseases and Diabetes, University of Pisa, Pisa, Italy; the <sup>4</sup>Department of Clinical and Experimental Medicine, University of Napoli Federico II, Naples, Italy; the <sup>5</sup>CINECA Interuniversity Consortium, Health Department, Bologna, Italy; and the <sup>6</sup>Unit of Metabolic Diseases and Clinical Dietetics, Alma Mater Studiorum University, Bologna, Italy.

Corresponding author: Graziella Bruno, graziella.bruno@unito.it.

DOI: 10.2337/dc12-0765

© 2012 by the American Diabetes Association. Readers may use this article as long as the work is properly cited, the use is educational and not for profit, and the work is not altered. See <http://creativecommons.org/licenses/by-nc-nd/3.0/> for details.

**Acknowledgments**—This work was supported by the Italian Society of Diabetology.

No potential conflicts of interest relevant to this article were reported.

G.B. researched data and wrote the manuscript. E.B., R.M., O.V., E.R., D.B., M.D.R., and G.M. researched data and reviewed and edited the manuscript. G.B. and G.M. are the guarantors of this work and, as such had full access to all the data in the study and take responsibility for the integrity of the data and the accuracy of the data analysis.

**References**

1. Marchesini G, Forlani G, Rossi E, Berti A, De Rosa M; ARNO Working Group. The direct economic cost of pharmacologically-treated diabetes in Italy-2006. The ARNO observatory. *Nutr Metab Cardiovasc Dis* 2011;21:339–346
2. De Micheli A. Italian standards for diabetes mellitus 2007: executive summary Diabete Italia, AMD Associazione Medici Diabetologi, SID Società Italiana di Diabetologia. *Acta Diabetol* 2008;45:107–127
3. Bruno G, De Micheli A, Frontoni S, Monge L; Società Italiana di Diabetologia-Associazione Medici Diabetologi (SID-AMD) Working Group on the Standards of Care for Diabetes. Highlights from “Italian Standards of Care for Diabetes Mellitus 2009-2010”. *Nutr Metab Cardiovasc Dis* 2011;21:302–314
4. Rossi MC, Nicolucci A, Arcangeli A, et al; Associazione Medici Diabetologi Annals Study Group. Baseline quality-of-care data from a quality-improvement program implemented by a network of diabetes outpatient clinics. *Diabetes Care* 2008;31:2166–2168
